# Supplementary material for: Effects of Natural Rhamnolipid Mixture on Dioleoylphosphatidylcholine Model Membrane Depending on Method of Preparation and Sterol Content
Source: MDPI journal article supplement (doi:10.3390/membranes13010112), 2023-01-15
Supplement: s1 [file s1]

Supplementary Materials

# Effects of Natural Rhamnolipid Mixture on Dioleoylphosphatidylcholine Model Membrane Depending on Method of Preparation and Sterol Content

Konstantin Potapov <sup>1</sup>, Alexander Gordeev <sup>2</sup>, Liliya Biktasheva <sup>2</sup>, Maya Rudakova <sup>3</sup> and Artem Alexandrov <sup>1,\*</sup>

<sup>1</sup> Department of Molecular Physics, Institute of Physics, Kazan Federal University, 420011 Kazan, Russia

<sup>2</sup> Institute of Environmental Sciences, Kazan Federal University, 420011 Kazan, Russia

<sup>3</sup> Institute of Information Technology and Intelligent Systems, Kazan Federal University, 420011 Kazan, Russia

\* Correspondence: alexandrov.artem.sergeyevich@gmail.com

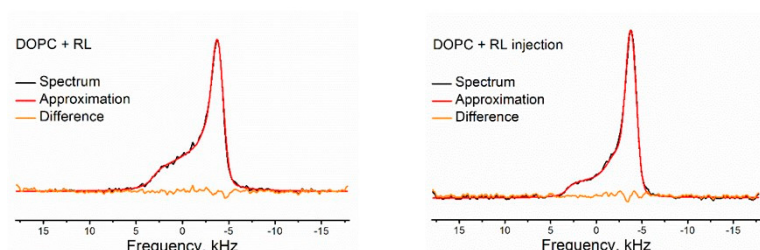

**Figure S1.** Example of approximation of  $^{31}\text{P}$ -NMR spectra of liposomes from DOPC and rhamnolipids, liposomes from DOPC with aqueous injection of rhamnolipids.

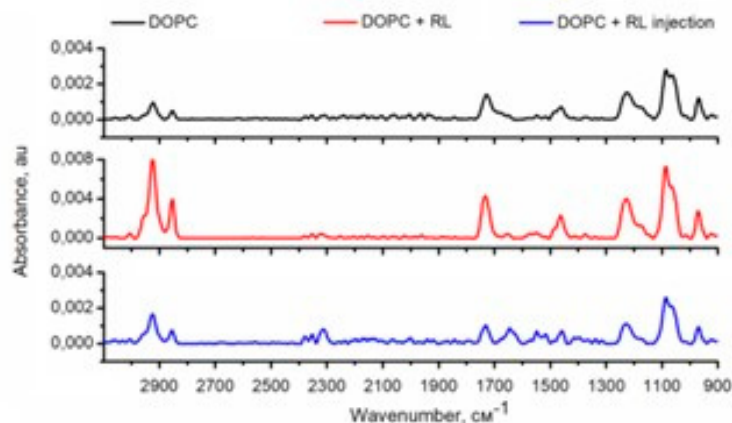

**Figure S2.** ATR-FTIR spectra of liposomes from DOPC without rhamnolipids, liposomes from DOPC and rhamnolipids, and liposomes from DOPC with injection of rhamnolipids.

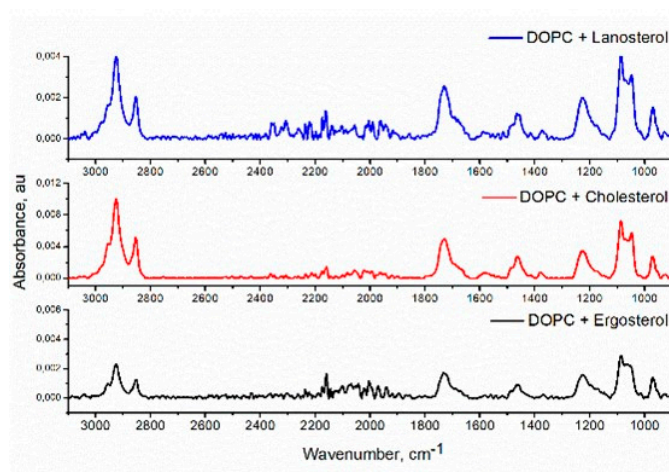

**Figure S3.** ATR-FTIR spectra for DOPC liposomes with ergosterol, cholesterol, and lanosterol without the addition of rhamnolipids.

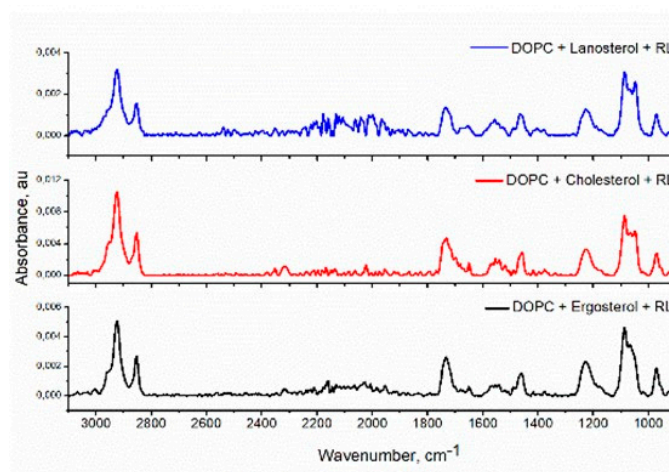

**Figure S4.** ATR-FTIR spectra for DOPC liposomes with ergosterol, cholesterol, and lanosterol with aqueous injection of rhamnolipids.
